# Supplementary material for: Roll-to-roll slot die production of 300 mm large area silver nanowire mesh films for flexible transparent electrodes
Source: Royal Society of Chemistry journal article supplement (doi:10.1039/c6ra26595b), 2017-01-01
Supplement: c6ra26595b1.pdf [file c6ra26595b1.pdf]

## SUPPORTING INFORMATION

# **Roll-to-roll slot die production of 300-mm large area silver nanowire mesh films for flexible transparent electrode**

Byung-Yong Wang,<sup>a</sup> Eung-Seok Lee,<sup>b</sup> Dae-Soon Lim,<sup>b</sup>

Hyun Wook Kang,<sup>c†</sup> and Young-Jei Oh<sup>d,e†</sup>

<sup>a</sup> Center for Semiconductor Technology, Korea University, 145 Anam-ro, Seongbuk-gu, Seoul, 02841, Republic of Korea.

<sup>b</sup> Department of Materials Science and Engineering, Korea University, 145 Anam-ro, Seongbuk-gu, Seoul, 02841, Republic of Korea.

<sup>c</sup> Department of Mechanical Engineering, Chonnam National University, 77 Yongbong-ro, Buk-gu, Gwangju 61186, Republic of Korea.

<sup>d</sup> Opto Electronic Materials and Devices Center, Korea Institute of Science and Technology, 5 Hwarang-ro 14-gil, Seongbuk-gu, Seoul 02792, Republic of Korea.

<sup>e</sup> Department of Nano Materials Science and Engineering, University of Science and Technology, 217 Gajeong-ro, Yuseong-gu, Daejeon 34113, Republic of Korea.

**Table S1.** Process variables and slot die parameters.

| <b>Process variables</b>   |                                 |
|----------------------------|---------------------------------|
| Gap between coater and web | 50um                            |
| Pump feeding rate (RPM)    | 10 ~ 100                        |
| Web speed (m/min)          | 1 ~ 10                          |
| <b>Slot die parameters</b> |                                 |
| Ink viscosity (cp)         | 40                              |
| Slot die shim (um)         | 30, 50, 100                     |
| Substrate                  | Acrylic resin over coating PET  |
| Web width                  | 45 mm                           |
| Coating length             | 380 m                           |
| Drying temperature         | 60 °C - 80 °C - 100 °C - 80 °C  |
| R2R machine used           | People & Techology, Inc., korea |

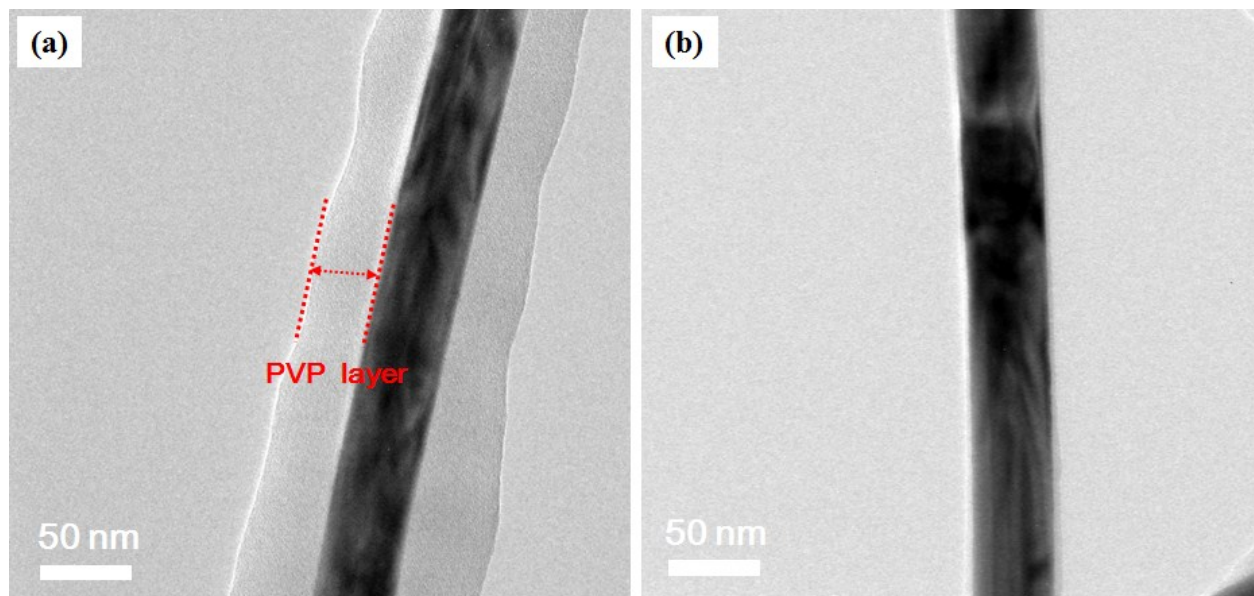

**Figure S1.** TEM images of the AgNW according to washing: (a) without washing, (b) x6 times washing.

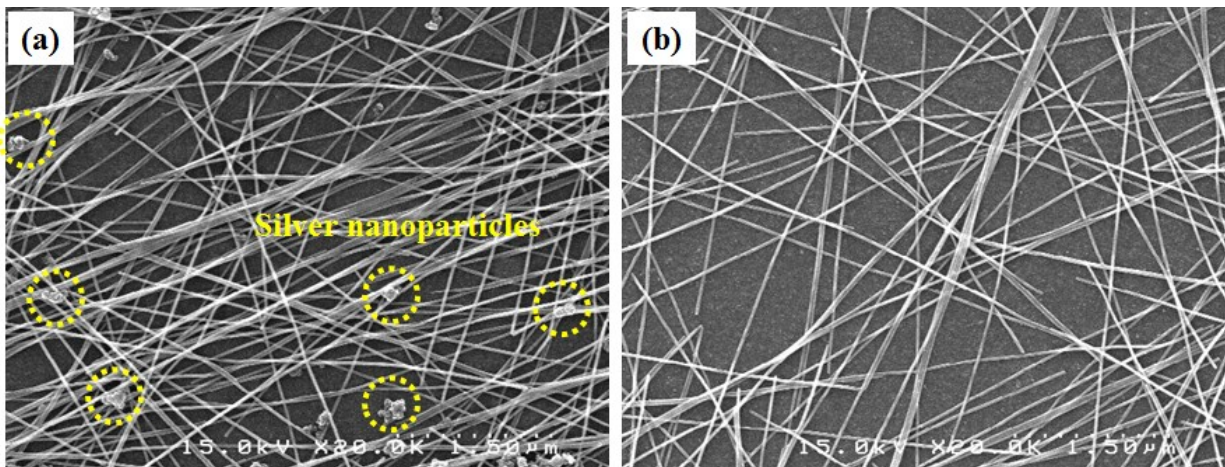

**Figure S2.** SEM images of the AgNW with different purification. (a) before purification, (b) after purification.

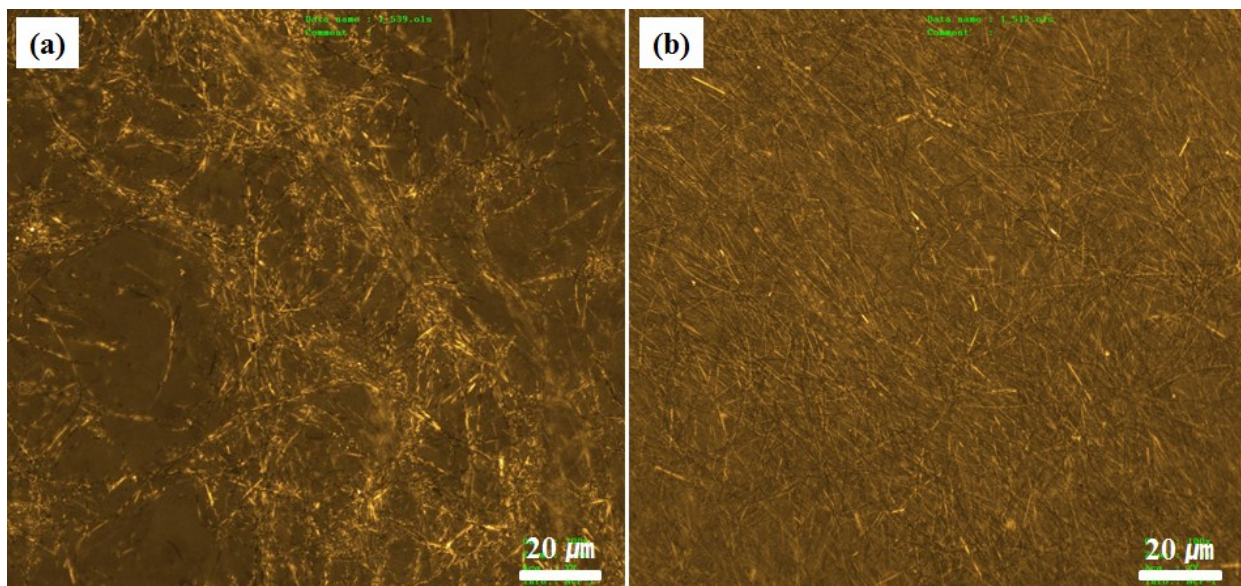

**Figure S3.** CLSM photos of AgNW mesh films obtained from (a) unformulated AgNW dispersion and (b) formulated AgNW dispersion with polymer dispersant.

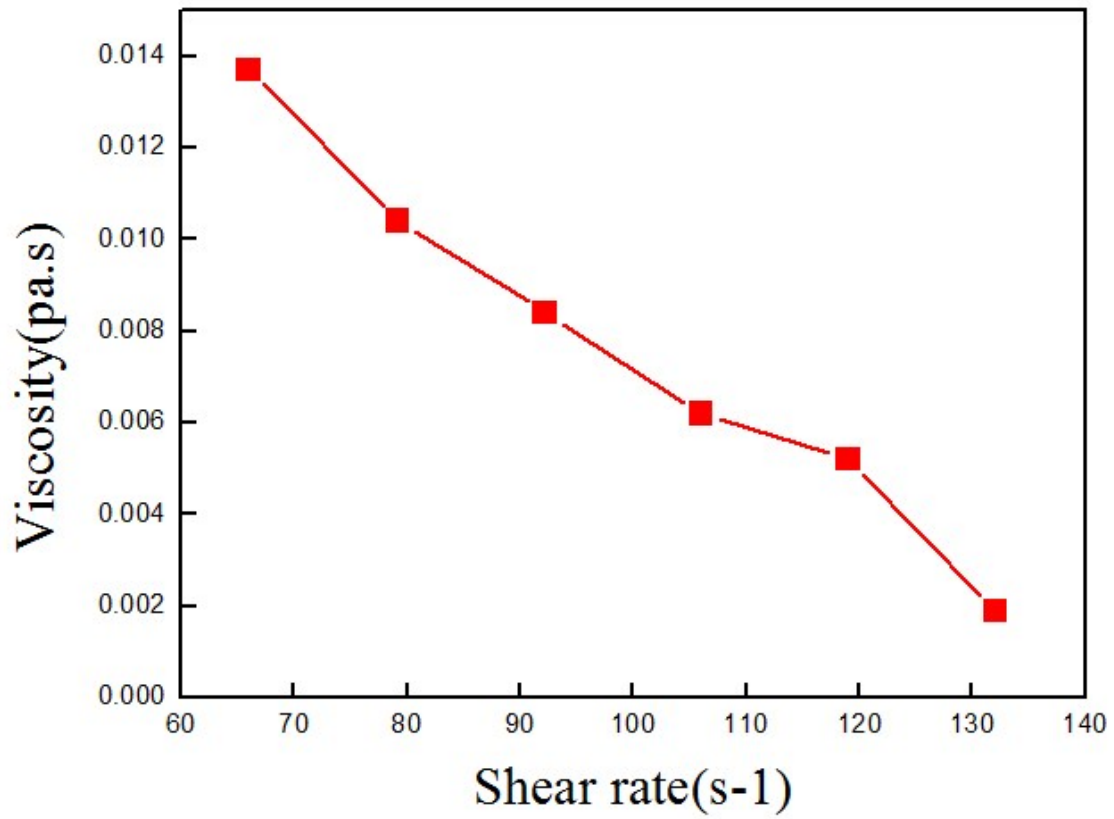

**Figure S4.** Viscosity(Pa·s) versus shear Rate(S<sup>-1</sup>) of the AgNW
